# Supplementary material for: Single-feature polymorphism mapping of isogenic rice lines identifies the influence of terpene synthase on brown planthopper feeding preferences
Source: PubMed Central journal article supplement (PMC4883687; doi:10.1186/1939-8433-6-18), 2013-08-02

A

Location of SFP in rice genome

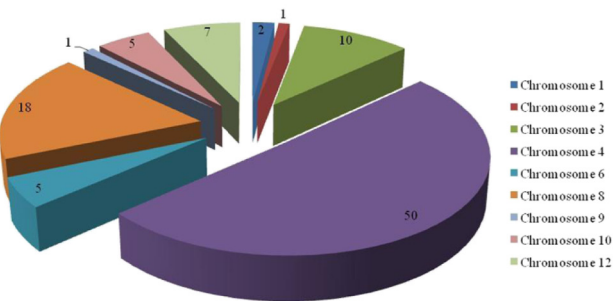

C

Functional classes of SFP-contained genes

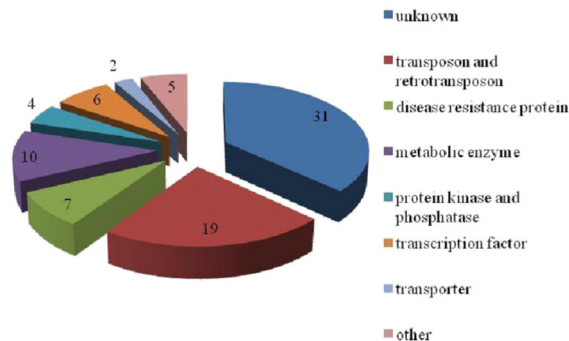

B

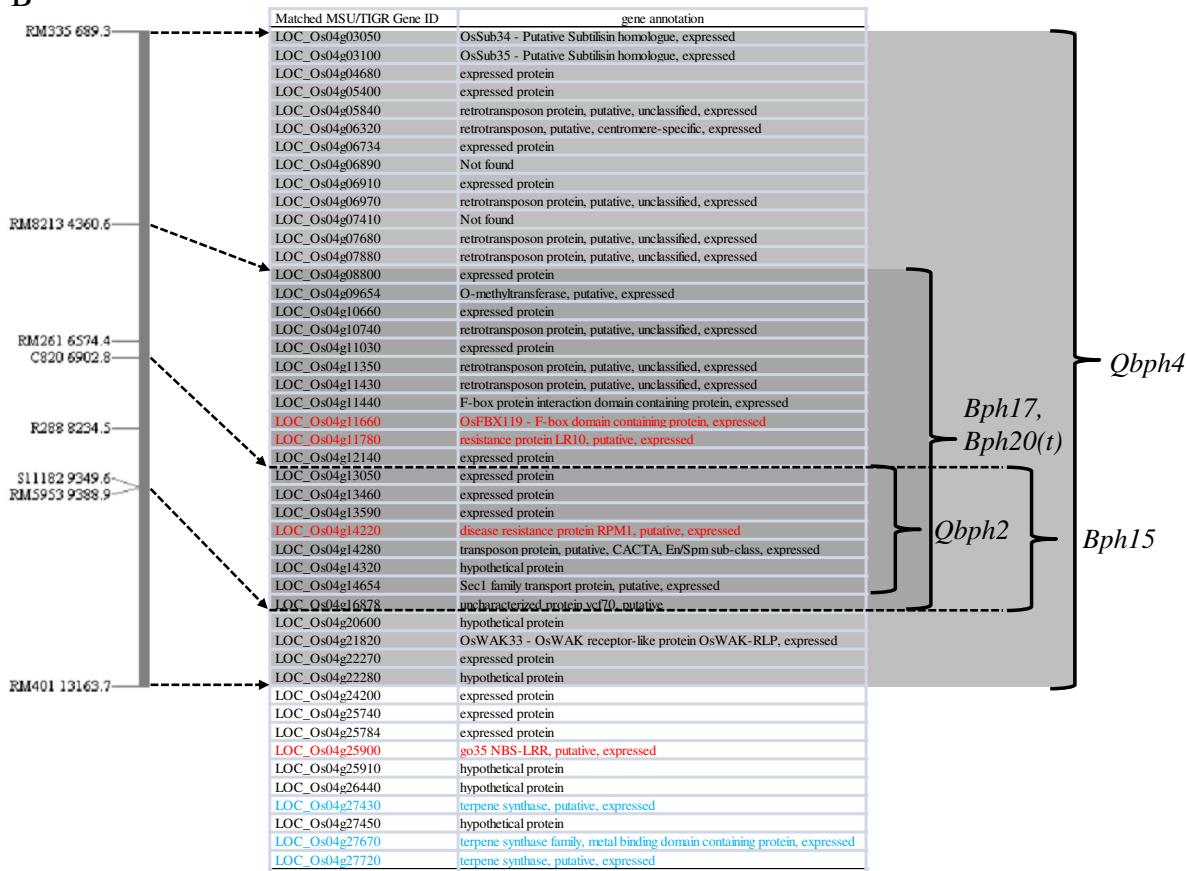

Supplement: 12284_2013_58_MOESM6_ESM.pdf [file 12284_2013_58_MOESM6_ESM.pdf]
