# Supplementary material for: Single-feature polymorphism mapping of isogenic rice lines identifies the influence of terpene synthase on brown planthopper feeding preferences
Source: PubMed Central journal article supplement (PMC4883687; doi:10.1186/1939-8433-6-18), 2013-08-02
Supplement: 12284_2013_58_MOESM9_ESM.pdf [file 12284_2013_58_MOESM9_ESM.pdf]

## A

RH MRKRADELKEKVRTLQGTCEDIVGTMNLVDAIQHLGIEHLFKQEIDNTRLDIRTSEFTSS 60  
 IL162 MRKRADELKEKVRTLQGTCEDIVGTMNLVDAIQHLGIEHLFKQEIDNTRLDIRTSEFTSS 60  
 KD MRKRADELKEKVRTLQGTCEDIVGTMNLVDAIQHLGIEHLFKQEIDNTRLDIRTSEFTSS 60  
 \*\*\*\*\*

RH SLHEVALWFRLLREHGLWVSPDVFVGF--KFDGDDARLSSVIADHDTRGLLSLYNAAHLLVH 118  
 IL162 SLHEVALWFRLLREHGLWVSPDVFVGF--KFDGDDARLSSVIADHDTRGLLSLYNAAHLLVH 118  
 KD SLHEVALWFRLLREHGLWVSPDVFVGFKFKFDGDDARLSSVIADHDTRGLLSLYNAAHLLVH 120  
 \*\*\*\*\*

RH GEPELEEAIS IARHHLKSMTRDCDLNPVLANQVNRALNIALPRTCKRLETSLFISEYEQE 178  
 IL162 GEPELEEAIS IARHHLKSMTRDCDLNPVLANQVNRALNIALPRTCKRLETSLFISEYEQE 178  
 KD GEPELEEAIS IARHRLKSMTRDCDLNPVLANQVNRALNIALPRTCKRLETSLFISEYEQE 180  
 \*\*\*\*\*

RH EGYSEILLELAKLDFNIVQNVLHMLKLSISEWWRDLTYVGLNYARDRAVEGYLWSCLVF 238  
 IL162 EGYSEILLELAKLDFNIVQNVLHMLKLSISEWWRDLTYVGLNYARDRAVEGYLWSCLVF 238  
 KD EGYSEILLELAKLDFNIVQNVLHMLKLSISEWWRDLTYVGLNYARDRAVEGYLWSCLVF 240  
 \*\*\*\*\*

RH YEKDLSFTRTFVAKMILLVTLMDDTFDSHATI QECRQLNSAIQRWDES AVTLLPEYLKKF 298  
 IL162 YEKDLSFTRTFVAKMILLVTLMDDTFDSHATI QECRQLNSAIQRWDES AVTLLPEYLKKF 298  
 KD YEKDLSFTRTFVAKMILLVTLMDDTFDSHATI QECRQLNSAIQRWDES AVTLLPEYLKKF 300  
 \*\*\*\*\*

RH YRELLRNFKVLQDQVTDNDKYRVTYTRKEFQKLSITYYLQEAEWSHQRHKPSFGDQITLTA 358  
 IL162 YRELLRNFKVLQDQVTDNDKYRVTYTRKEFQKLSITYYLQEAEWSHQRHKPSFGDQITLTA 358  
 KD YRELLRNFKVLQDQVTDNDKYRVTYTRKEFQKLSITYYLQEAE-----PSFGDQITLTA 353  
 \*\*\*\*\*

RH MSSVIPLLCVSGTVGMGYVTMETFEWVASRTTAAIVASAKIGRFMNDIAAMKRGKNGKDVA 418  
 IL162 MSSVIPLLCVSGTVGMGYVTMETFEWVASRTTAAIVASAKIGRFMNDIAAMKRGKNGKDVA 418  
 KD MSSVIPLLCVSGTVGMGYVTMETFEWVASRTTAAIVASAKIGRFMNDIAAMKRGKNGKDVA 413  
 \*\*\*\*\*

RH SSVECYMNEHKVTMEVAIDKIDSLVEDEWRTL NQAHFEDHKLFPVVEQVNL TASMASFY 478  
 IL162 SSVECYMNEHKVTMEVAIDKIDSLVEDEWRTL NQAHFEDHKLFPVVEQVNL TASMASFY 478  
 KD SSVECYMNEHKVTMEVAIDKIDSLVEDEWRTL NQAHFEDHKLFPVVEQVNL TASMASFY 473  
 \*\*\*\*\*

RH DERKDAYTFPTLLQDTIESLFVNPVPI- 505  
 IL162 DERKDAYTFPTLLQDTIESLFVNPVPI- 505  
 KD DERKDAYTFPTLLQDTIESLFVNPVPI- 500  
 \*\*\*\*\*

## B

*OsKS4\_diTPS* dvtkYnveswldylrslatdAEWqrskYvPtmEeymknSiVtfaLgptiliAlyfMGq  
*MonoTPS* npInh1kKawamLfdgfMtEtKwlsaqGvPdsEeyLrngvVtSgVPLVfVhllfMLGh  
*ZmTPS8* YRVaYarKaYqLsksYLQEvEwHqGytPSFDDhVSVStasAgIqvLCVgmlVGMGD  
*OsZIS1* YRVtMCKKEFQnLSTYYLQEfEwHqQnYkPaFKerVALStLSStVpLLCatAaVqGqD  
*RH\_Os04g27430* YRVTYTrKEFQkLSTYYLQEAEWshHqYkPSFgDQITLtAMSSvIPLLCVsgtVGMGy  
*KD\_Os04g27430* YRVTYTrKEFQkLSTYYLQEA-----PSFgDQITLtAMSSvIPLLCVsgtVGMGy  
*Nip\_Os04g27430* YRVTYTrKEFQkLSTYYLQEA-----PSFgDQITLtAMSSvIPLLCVsgtVGMGy  
*AaEBFS* YQIhYvKemakeLvrnYlVearWlkeGYmPtLfeymSVSmVtgtygLMiarSyVGrGD  
*CjEBFS* YgIpYaKqmmQeLiilyftEakWlYkGYvPtFDeyskValrSigLrtLaVaSfVdLGD
