# Supplementary material for: Single-feature polymorphism mapping of isogenic rice lines identifies the influence of terpene synthase on brown planthopper feeding preferences
Source: PubMed Central journal article supplement (PMC4883687; doi:10.1186/1939-8433-6-18), 2013-08-02
Supplement: 12284_2013_58_MOESM10_ESM.pdf [file 12284_2013_58_MOESM10_ESM.pdf]

|       |                                                                        |     |                  |
|-------|------------------------------------------------------------------------|-----|------------------|
|       | TTTCAGCAATTCTATATCTTTTATAAATGTAGGTAGGGTACGTATATCATAGTTTTATTAT          | 60  |                  |
| IL162 | TTTCAGCAATTCTATATCTTTTATAAATGTAGGTAGGGTACGTATATCATAGTTTTATTAT          | 60  |                  |
| KD    | TTTCAGCAATTCTATATCGTTTATAAATGTAGGTAGGGTACGTATATCATAGTTTTATTAT          | 60  |                  |
|       | *****                                                                  |     |                  |
| RH    | TTGCGTAGCCTAAATATTTGATGGACTTCTACGTGATGAGATGATCACAAAATTAACA             | 120 |                  |
| IL162 | TTGCGTAGCCTAAATATTTGATGGACTTCTACGTGATGAGATGATCACAAAATTAACA             | 120 |                  |
| KD    | TTGCGTAGCCTAAATATTTGATGGACTTCTACGTGATGAGATGATCACAAAATTAACA             | 120 |                  |
|       | *****                                                                  |     |                  |
| RH    | ATCAACATGTTTCAGATTTGAATAAGCGCTTATATTCAAGCAGAATTAATGTGTACATATA          | 180 |                  |
| IL162 | ATCAACATGTTTCAGATTTGAATAAGCGCTTATATTCAAGCAGAATTAATGTGTACATATA          | 180 |                  |
| KD    | ATCAACATGTTTCAGATTTGAATAAGCGCTTATATTCAAGCAGAATTAATGTGTACATATA          | 180 |                  |
|       | *****                                                                  |     |                  |
| RH    | TTTCTGATGTTTTTCTTGCACATGGTATTAGTTCATGTAAGATTATCTTTCCTTTTTTTTT          | 240 |                  |
| IL162 | TTTCTGATGTTTTTCTTGCACATGGTATTAGTTCATGTAAGATTATCTTTCCTTTTTTTTT          | 240 |                  |
| KD    | TTTCTGATGTTTTTCTTGCACATGGTATTAGTTCATGTAAGATTATCTTTCCTTTTTTTTT          | 240 |                  |
|       | *****                                                                  |     |                  |
|       |                                                                        |     | <u>TF search</u> |
|       |                                                                        |     | <u>score</u>     |
|       | <b>ATHB-1</b>                                                          |     |                  |
| RH    | CATAATTTCTGCATGTACTIONTTTTGACA <b>AATTAATTATTGCT</b> AGAACTGTTTCATGAAT | 300 | 87.2             |
| IL162 | CATAATTTCTGCATGTACTIONTTTTGACA <b>AATTAATTATTGCT</b> AGAACTGTTTCATGAAT | 300 | 87.2             |
| KD    | CATAATTTCTGCATGTACTIONTTTTGACA <b>AATTCATTATTGCT</b> AGAACTGTTTCATGAAT | 300 | 0                |
|       | *****                                                                  |     |                  |
|       | <b>SBF-1</b>                                                           |     |                  |
| RH    | ATTGTAATGTTATTTACAAAGCTTT <b>GTGTGGTTAATAAT</b> CTCTTTTTGATAACTATAAT   | 360 | 98.1             |
| IL162 | ATTGTAATGTTATTTACAAAGCTTT <b>GTGTGGTTAATAAT</b> CTCTTTTTGATAACTATAAT   | 360 | 98.1             |
| KD    | ATTGTAATGTTATTTACAAAGCTTT <b>GCATGGTTAATAAT</b> CTCTTTTTGATAACTATAAT   | 360 | 92.5             |
|       | *****                                                                  |     |                  |
|       | <b>P</b>                                                               |     |                  |
| RH    | AAATCAAACTCGTGAATCCA <b>ACCAACCAG</b> AGATCGGAAGAATGG                  | 404 | 98.2             |
| IL162 | AAATCAAACTCGTGAATCCA <b>ACCAACCAG</b> AGATCGGAAGAATGG                  | 404 | 98.2             |
| KD    | AAATCAAACTCGTGAATCCA <b>ACTAACCAG</b> AGATCGGAAGAATGG                  | 404 | 86.5             |
|       | *****                                                                  |     |                  |
